# Supplementary material for: Crucial factors of the inflammatory microenvironment (IL-1β/TNF-α/TIMP-1) promote the maintenance of the malignant hemopoietic clone of myelofibrosis: an in vitro study
Source: PubMed Central journal article supplement (PMC5190072; doi:10.18632/oncotarget.9949), 2016-06-11
Supplement: oncotarget-07-43974-s001.pdf [file oncotarget-07-43974-s001.pdf]

## Crucial factors of the inflammatory microenvironment (IL-1 $\beta$ /TNF- $\alpha$ /TIMP-1) promote the maintenance of the malignant hemopoietic clone of myelofibrosis: an *in vitro* study

### Supplementary Materials

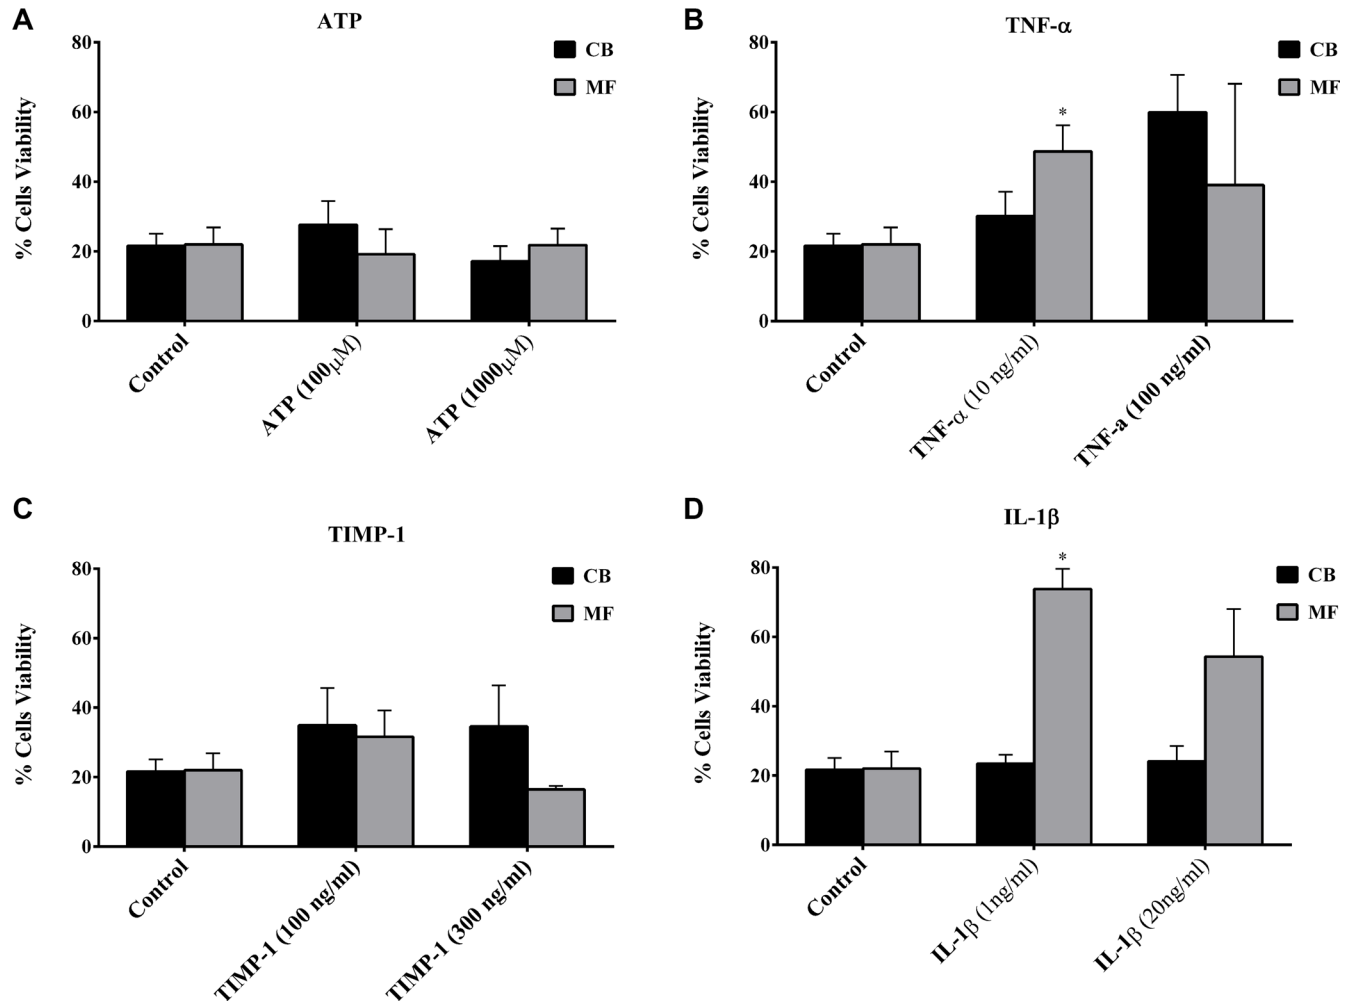

**Supplementary Figure S1: Survival of MF- and CB-derived CD34<sup>+</sup> cells after *in vitro* treatment with increasing doses of inflammatory factors.** CD34<sup>+</sup> cells from MF patients ( $n = 4$ ) or CB ( $n = 3$ ) were *in vitro* treated for 4 days with factors alone (ATP (100, 1000  $\mu$ M), TNF- $\alpha$  (10, 100 ng/mL), TIMP-1 (100, 300 ng/mL) and IL-1 $\beta$  (1, 20 ng/mL)) and the percentage of cell viability was assessed after AnnexinV/PI staining, as described in methods. (\* $p \leq 0.05$  vs untreated cells).

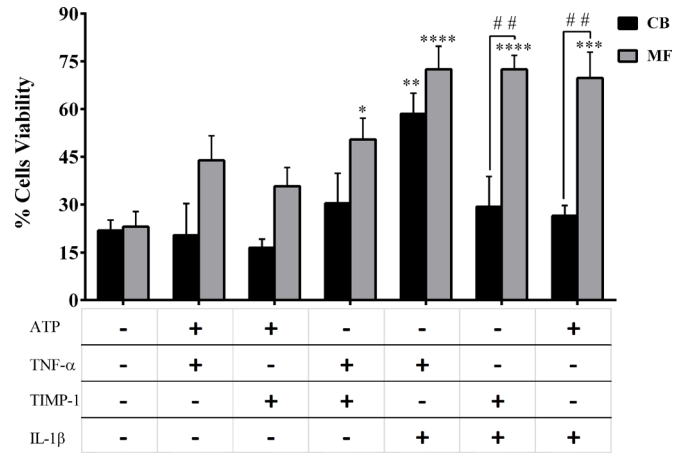

**Supplementary Figure S2: Survival of CD34<sup>+</sup> cells from MF patients is increased by various combinations of pro-inflammatory factors.** CD34<sup>+</sup> cells from MF patients ( $n = 20$ ) or CB ( $n = 8$ ) were *in vitro* treated for 4 days with factors two by two and the percentage of cell viability was assessed after AnnexinV/PI staining, as described in Methods. Cells viability of MF-derived CD34<sup>+</sup> cells was significantly increased by IL-1 $\beta$  + TNF- $\alpha$ , IL-1 $\beta$  + TIMP-1, TNF- $\alpha$  + TIMP-1 and IL-1 $\beta$  + ATP as compared with untreated cells. Conversely, only the IL-1 $\beta$  + TNF- $\alpha$  combination was effective in stimulating the *in vitro* survival of the CB-derived CD34<sup>+</sup> cells. Comparing MF vs CB, IL-1 $\beta$  + TIMP-1 and IL-1 $\beta$  + ATP significantly promoted the survival of the MF-derived cells. All data are presented as mean  $\pm$  SEM. (\* $p \leq 0.05$ ; \*\* $p \leq 0.01$ ; \*\*\* $p \leq 0.001$ ; \*\*\*\* $p \leq 0.0001$  vs untreated cells (CTR)) (## $p \leq 0.01$  vs CB).

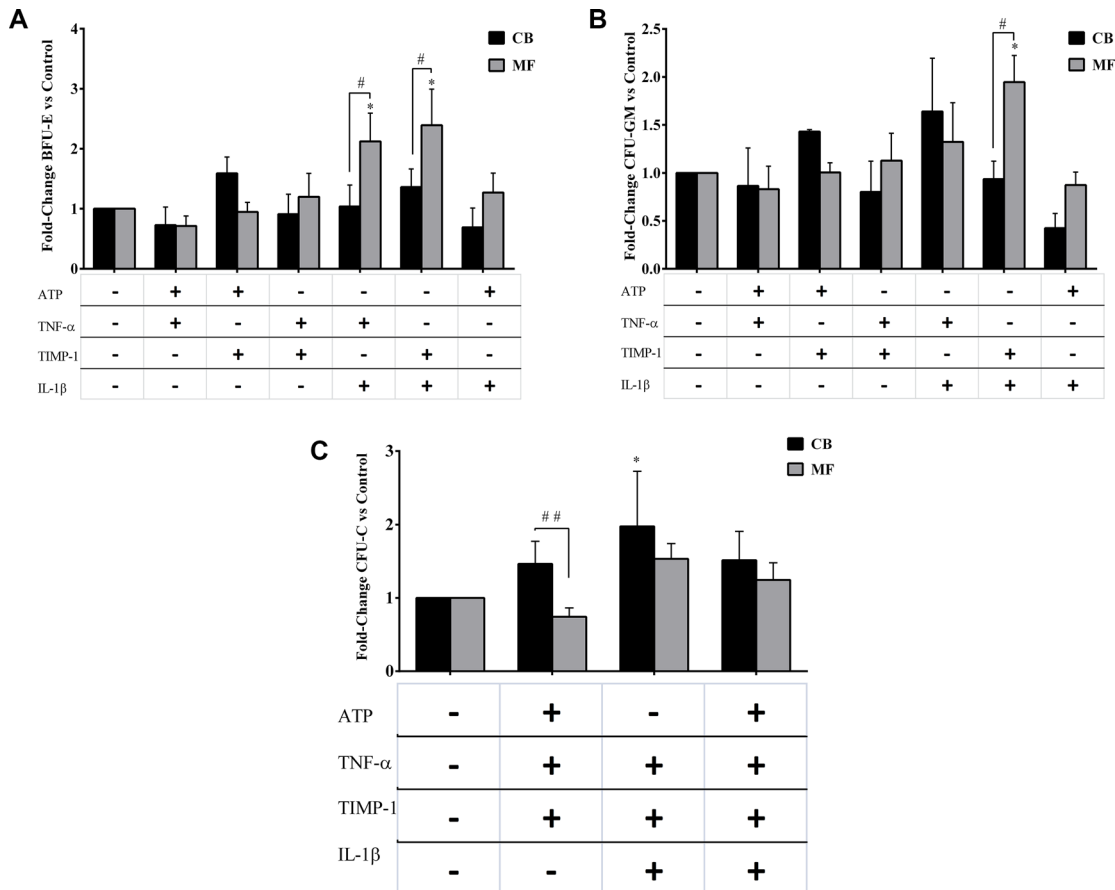

**Supplementary Figure S3: Effects of inflammatory factors on BFU-E/CFU-GM growth from MF- and CB-derived CD34<sup>+</sup> cells.** Circulating CD34<sup>+</sup> cells were isolated from MF patients ( $n = 20$ ) and CB units ( $n = 8$ ) and cultured in semisolid medium in the presence of the selected two-by-two or multiple pro-inflammatory factors. After 14 days, the BFU-E/CFU-GM (A and B) and the total CFU-C (C) output was assessed. (A) When IL-1 $\beta$  + TIMP-1 and IL-1 $\beta$  + TNF- $\alpha$  were added in culture, the BFU-E growth of MF-derived, but not CB-derived, CD34<sup>+</sup> cells was significantly increased as compared with the untreated samples and the CB counterparts. None of the others combinations were effective. (B) The growth of CFU-GM from MF-derived CD34<sup>+</sup> cells showed the same pattern displayed by BFU-E. (C) When various combinations of inflammatory factors were tested, MF-derived CD34<sup>+</sup> cells showed a decreased number of CFU-C compared to CB in response to ATP, TNF $\alpha$ , and TIMP. All data are presented as mean  $\pm$  SEM. (\* $p \leq 0.05$  vs untreated cells) (# $p \leq 0.05$ ; ## $p \leq 0.01$  vs CB).

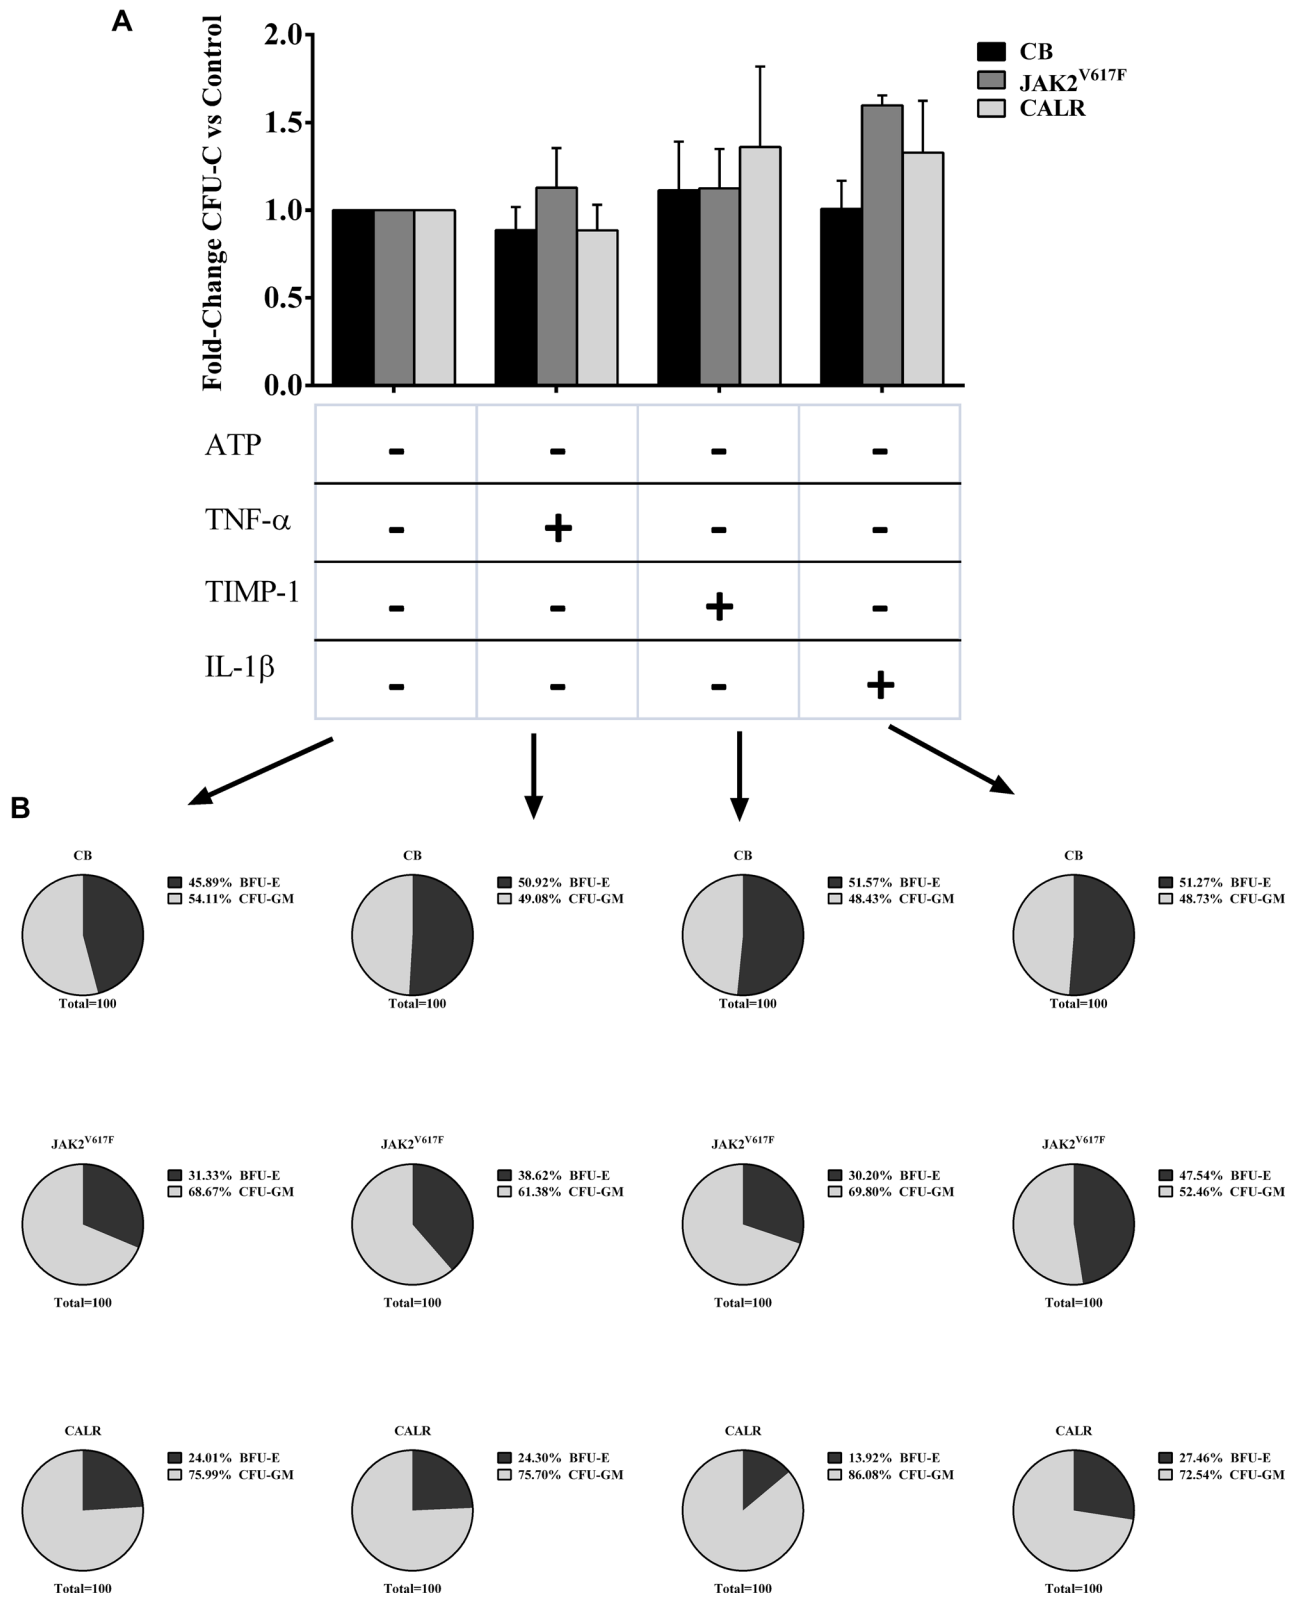

**Supplementary Figure S4: Effects of pro-inflammatory factors alone on CFU-C growth of CD34<sup>+</sup> cells from *JAK2*<sup>V617F</sup> and *CALR* mutated patients.** (A) When CFU-C growth of CD34<sup>+</sup> cells from *JAK2*<sup>V617F</sup> ( $n = 10$ ) and *CALR* ( $n = 6$ ) mutated patients was assessed in the presence of factors alone, no differences were observed between CB samples and between the two mutated groups. (B) Colony composition analysis demonstrated that only IL-1 $\beta$  enhanced the erythroid compartment of the *JAK2*<sup>V617F</sup> mutated group.

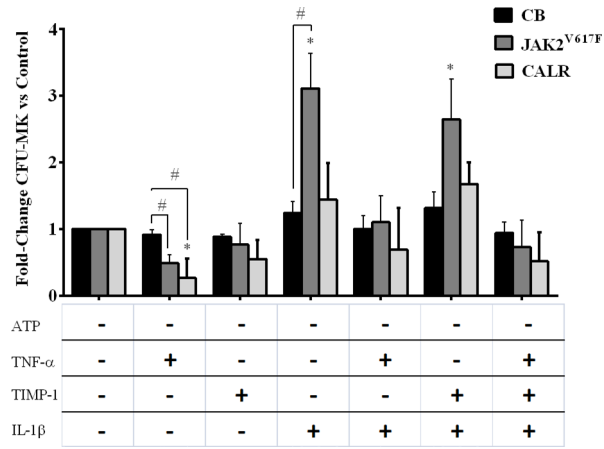

**Supplementary Figure S5: CFU-MK growth according to mutation status.** CFU-MK growth from *JAK2*<sup>V617F</sup> ( $n = 6$ ) and *CALR* ( $n = 4$ ) mutated patients was significantly inhibited by TNF- $\alpha$  as compared with CB counterparts. By contrast, IL-1 $\beta$  and IL1 $\beta$  + TNF- $\alpha$  stimulated the CFU-MK growth of *JAK2*<sup>V617F</sup> mutated patients ( $*p \leq 0.05$  vs untreated cells) ( $^{\#}p \leq 0.05$ ;  $^{\#\#}p \leq 0.01$  *JAK2*<sup>V617F</sup>/*CALR* mutated patients vs CB).

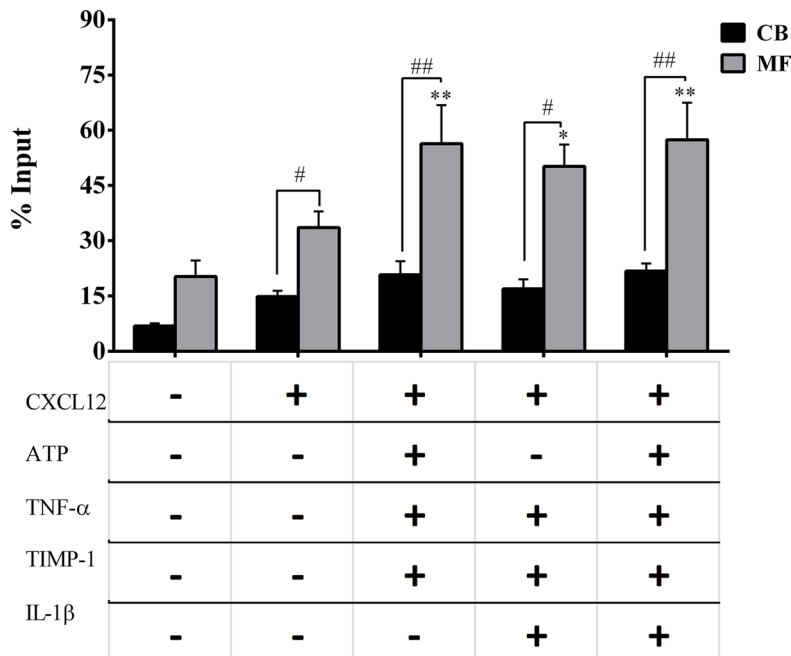

**Supplementary Figure S6: Various combinations of pro-inflammatory factors significantly promote migration of MF-derived CD34<sup>+</sup> cells.** When migration toward multiple combinations of factors + CXCL12 was analysed, the migration ability of MF-derived ( $n = 15$ ), but not CB-derived ( $n = 8$ ), CD34<sup>+</sup> cells was significantly increased. ( $*p \leq 0.05$ ;  $**p \leq 0.01$  vs spontaneous migration) ( $^{\#}p \leq 0.05$ ;  $^{\#\#}p \leq 0.01$  vs CB). Results are expressed as mean percentages  $\pm$  SEM of input.

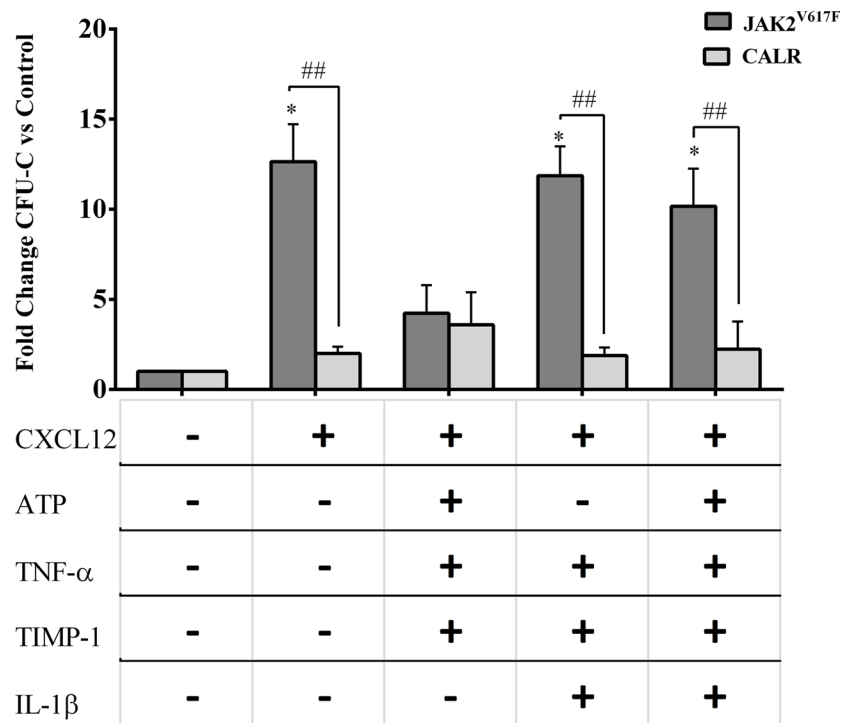

**Supplementary Figure S7: CFU-C post-migration assay according to mutation status.** The clonogenic potential of CD34<sup>+</sup> cells from *JAK2*<sup>V617F</sup> ( $n = 8$ )/*CALR* ( $n = 6$ ) mutated patients after migration toward CXCL12 alone or various combinations of pro-inflammatory factors + CXCL12 (CFU-C post-migration) is shown. After migration toward various combinations of pro-inflammatory factors, only the *JAK2*<sup>V617F</sup>-derived CD34<sup>+</sup> cells show significantly increased clonogenic potential. Results are expressed as mean fold change of CFU-C  $\pm$  SEM. (\* $p \leq 0.05$  vs spontaneous migration) ( $^{##}p \leq 0.01$  *JAK2*<sup>V617F</sup> vs *CALR* mutated patients).

**Supplementary Table S1: The following MoAbs were used to phenotypically characterize the MF- and CB-derived cells**

- anti-CD34 (clone 8G12)
- anti-CD38 (clone HIT2)
- anti-CD47 (clone B6H12)
- anti-CD45 (clone HI30)
- anti-CD184 (CXCR4; clone 12G5)
- anti-CD49d (clone 9F10)
- anti-CD44 (clone G44-26)
- anti-CD41a (clone HIP8)

All from BD Biosciences (San Jose, CA USA)

- anti-CD63 (TIMP-1 receptor; clone H5C6) from eBioscience (San Diego, CA USA),
- anti-CD133 (clone AC133) (Miltenyi Biotech, Bologna, Italy).

Negative controls were isotype-matched irrelevant MoAbs (BD Biosciences and Miltenyi Biotech).
